# Supplementary material
Source: Springer Nature journal article supplement (https://www.springermedizin.de/resource/supplementary/12879_2006_374_MOESM1_ESM.pdf/9448532)

## Prevalence of STH in PICT: WHO survey 2001-2

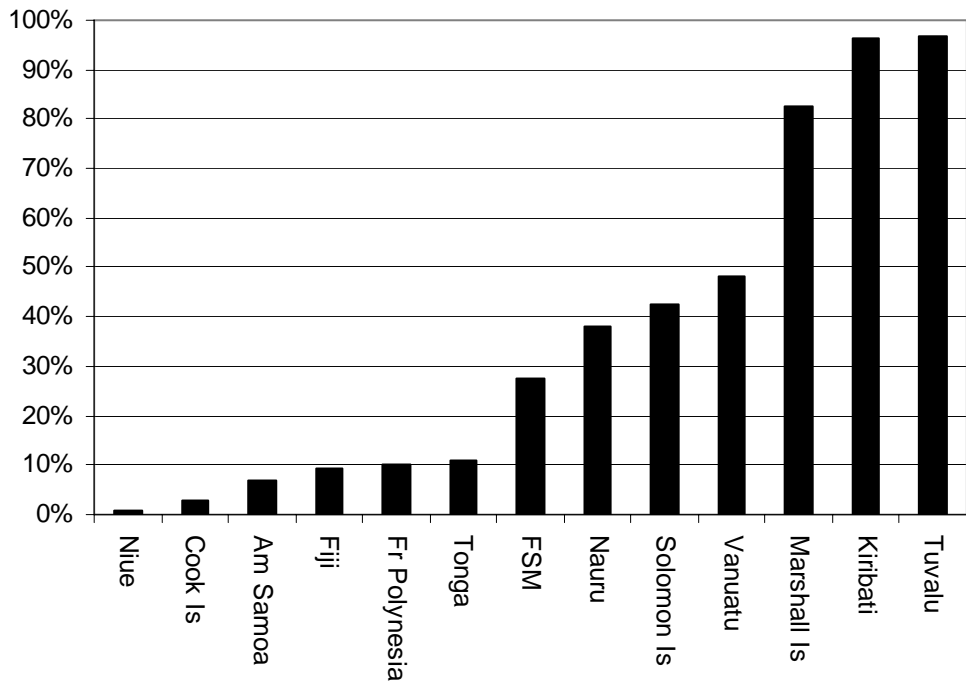

Supplement: MOESM1 [file 9448532]
